# Supplementary material for: Light and circadian regulation of clock components aids flexible responses to environmental signals
Source: PubMed Central journal article supplement (PMC4286021; doi:10.1111/nph.12853), 2014-05-20
Supplement: nph0203-0568-SD1.pdf [file nph0203-0568-SD1.pdf]

# Supporting Information Figures S1-S7

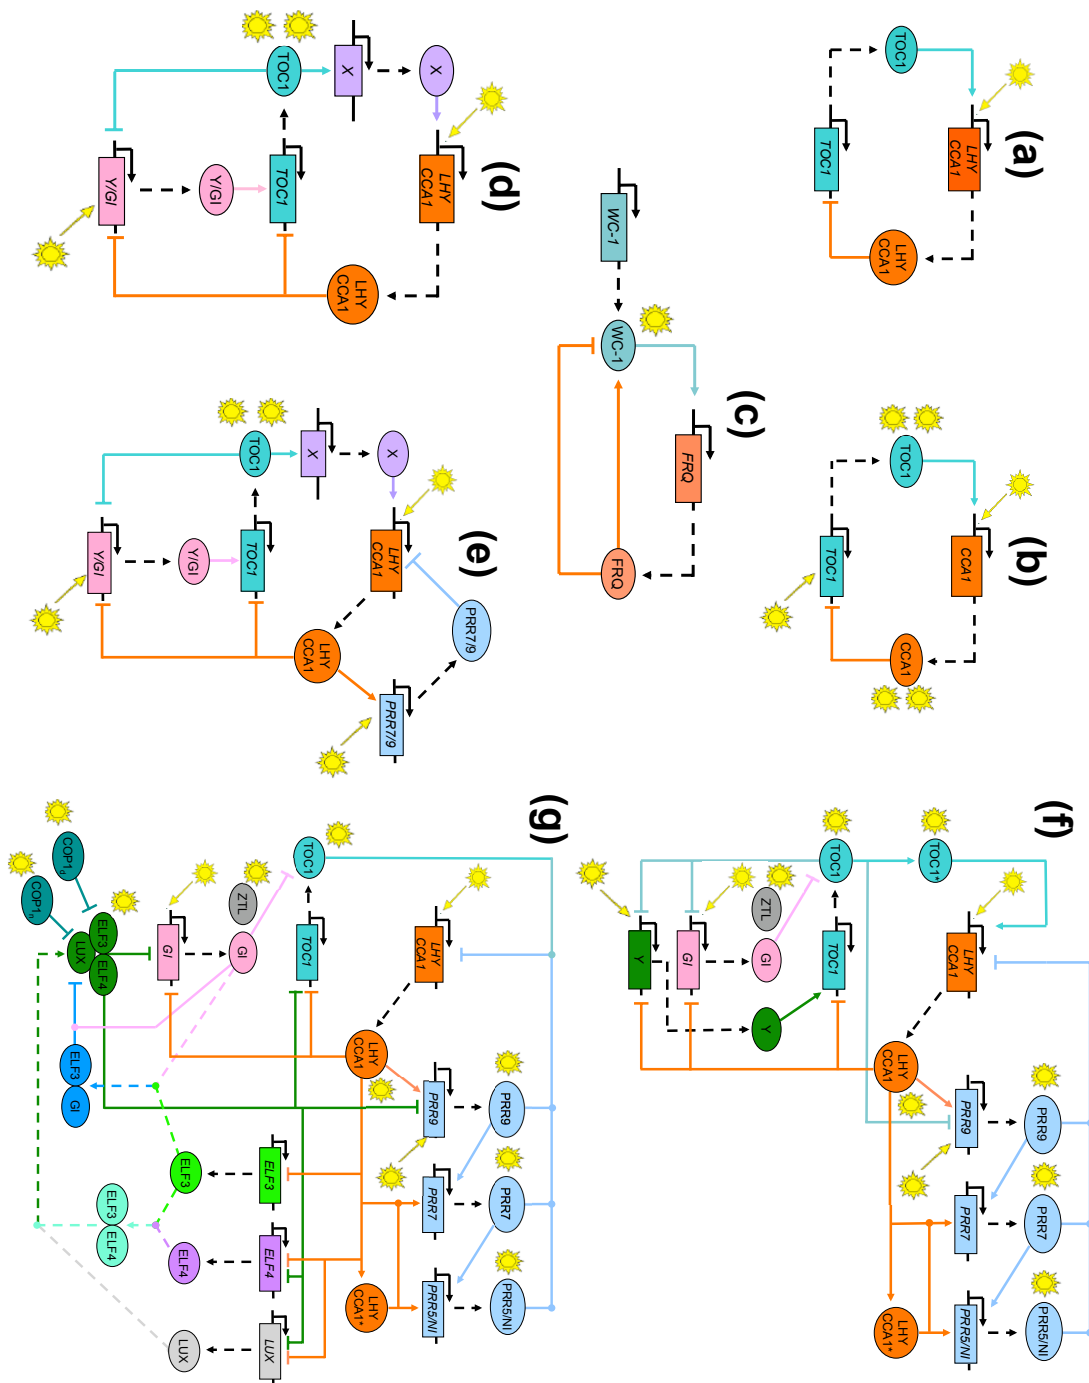

**Fig. S1.** Circuit diagrams for the clock models.

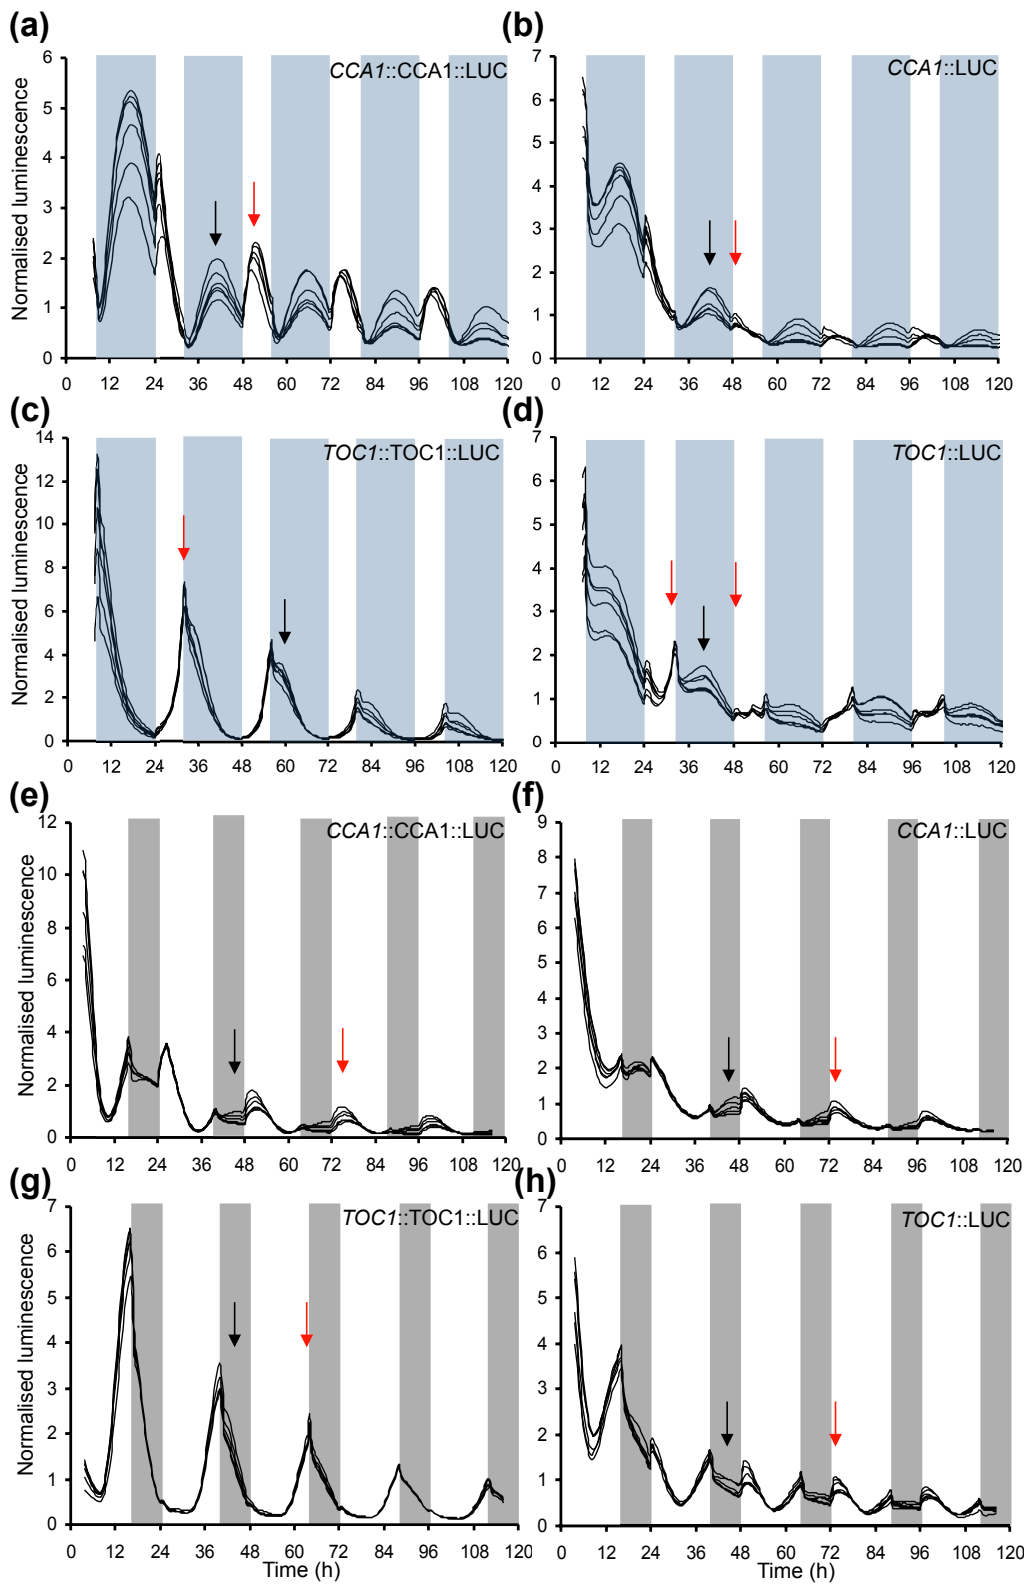

**Fig. S2.** Core circadian markers in *O. tauri* under photoperiodic entrainment.

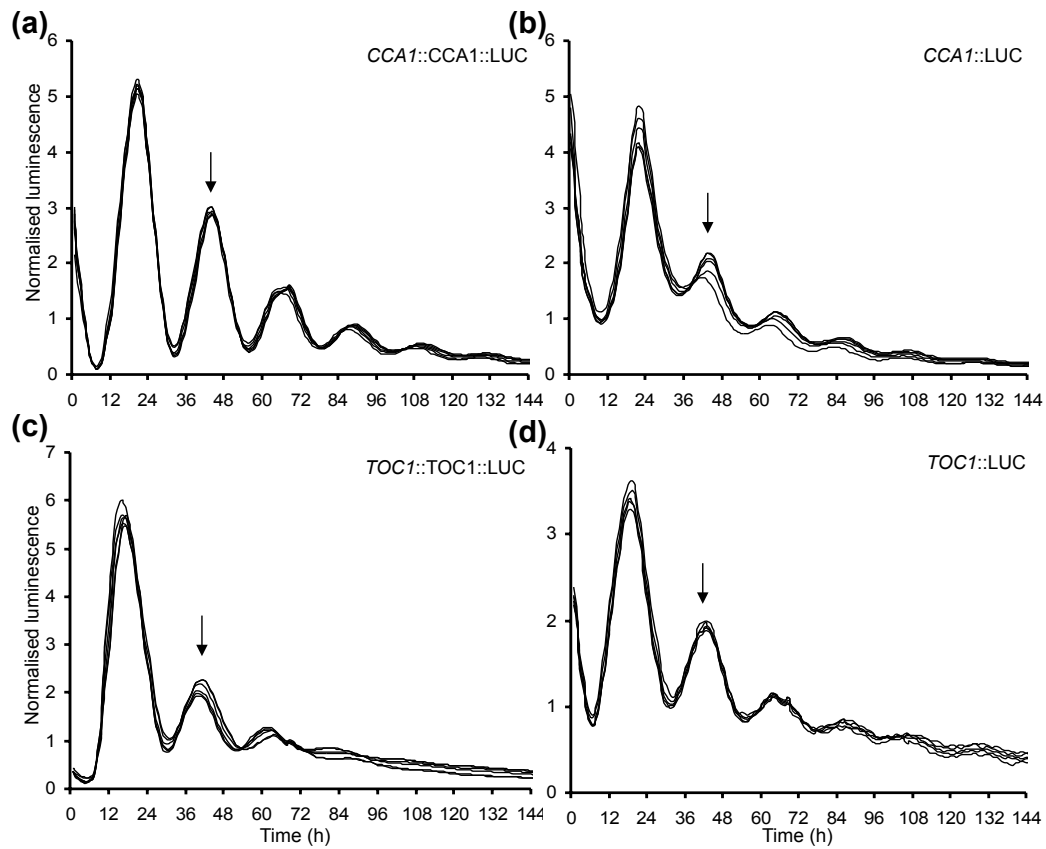

**Fig. S3.** *O. tauri* rhythms under constant light.

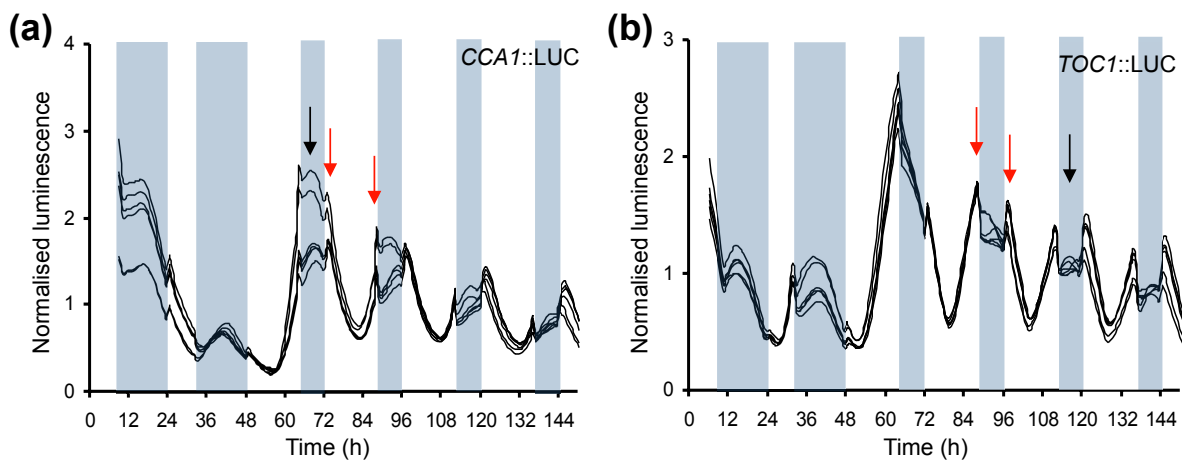

**Fig. S4.** Short day to long day transitions of *O. tauri* transcriptional markers.

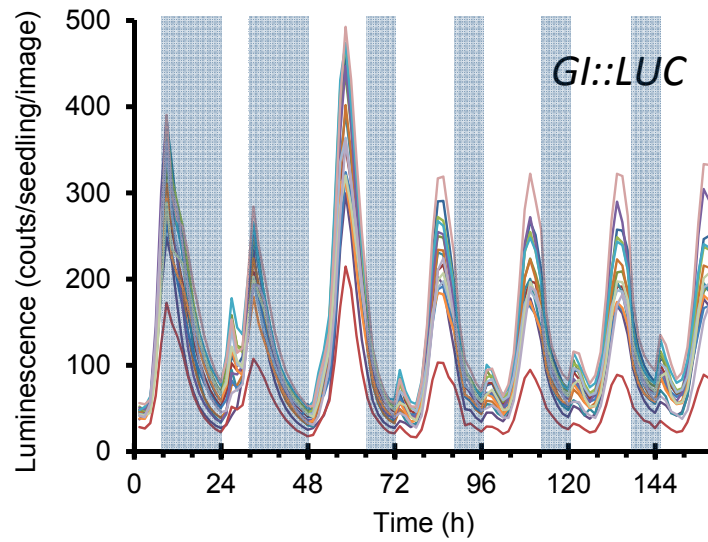

**Fig. S5.** Reproducibility of short day to long day transition in *A. thaliana* for the GIGANTEA gene.

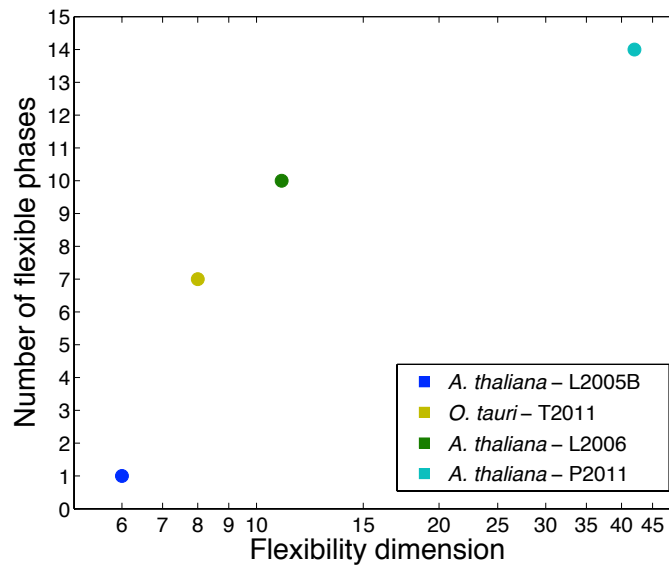

**Fig. S6.** Loop flexibility confers phase flexibility.

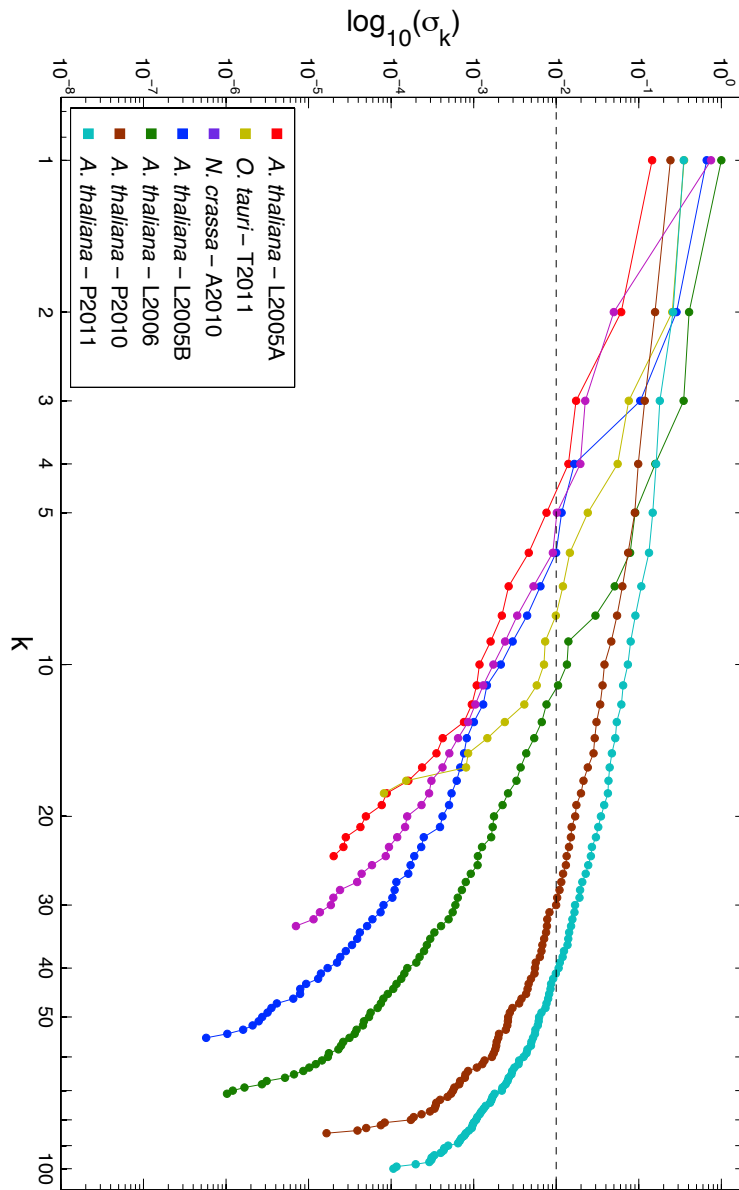

**Fig. S7.** Singular value spectra for the entrained clock models.

## Figure Legend References

**Akman OE, Rand DA, Brown PE, Millar AJ. 2010.** Robustness from flexibility in the fungal circadian clock. *Biomedical Central Systems Biology* **4**: 88

**Locke JC, Millar AJ, Turner MS. 2005a.** Modelling genetic networks with noisy and varied experimental data: the circadian clock in *Arabidopsis thaliana*. *Journal of Theoretical Biology* **234**: 383-393

**Locke JCW, Southern MM, Kozma-Bognár L, Hibberd V, Brown PE, Turner MS, Millar AJ. 2005b.** Extension of a genetic network model by iterative experimentation and mathematical analysis. *Molecular Systems Biology* **1**:13

**Locke JCW, Kozma-Bognar L, Gould PD, Feher B, Kevei E, Nagy F, Turner MS, Hall A, Millar AJ. 2006.** Experimental validation of a predicted feedback loop in the multi-oscillator clock of *Arabidopsis thaliana*. *Molecular Systems Biology* **2**:59

**Pokhilko A, Hodge SK, Stratford K, Knox K, Edwards KD, Thomson AW, Mizuno T, Millar AJ. 2010.** Data assimilation constrains new connections and components in a complex, eukaryotic circadian clock model. *Molecular Systems Biology* **6**: 416

**Pokhilko A, Fernández AP, Edwards KD, Southern MM, Halliday KJ, Millar AJ. 2012.** The clock gene circuit in *Arabidopsis* includes a repressilator with additional feedback loops. *Molecular Systems Biology* **8**: 574

**Rand DA, Shulgin BV, Salazar D, Millar AJ. 2004.** Design principles underlying circadian clocks. *Journal of Royal Society Interface* **1**: 119-130

**Rand DA, Shulgin BV, Salazar JD, Millar AJ. 2006.** Uncovering the design principles of circadian clocks: mathematical analysis of flexibility and evolutionary goals. *Journal of Theoretical Biology* **238**: 616-635.

**Rand DA. 2008.** Mapping global sensitivity of cellular network dynamics: sensitivity heat maps and a global summation law. *Journal of Royal Society Interface* **5**: S59-S69.

**Troein C, Corellou F, Dixon LE, Van Ooijen G, O'Neill JS, Bouget F-Y, Millar AJ. 2011.** Multiple light inputs to a simple clock circuit allow complex biological rhythms. *Plant Journal* **66**: 375-385.
